# Supplementary material
Source: PubMed Central journal article supplement (PMC3962291)
Supplement: NIHMS506081-supplement-01.pdf [file NIHMS506081-supplement-01.pdf]

## Supplementary Material

**Figure S1.** Grand mean olfactory ERP [ $\mu\text{V}$ ] waveforms (-100 to 1400 ms, 100 ms pre-stimulus baseline) referenced to linked mastoids for 21 CHR patients comparing weak, medium and strong  $\text{H}_2\text{S}$  stimuli and blank air at all 49 recording sites.

**Figure S2.** ERP waveforms as in Figure S1 for 20 healthy controls.

**Figure S3.** Average-referenced ERP waveforms for 21 CHR patients (cf. Fig. S1).

**Figure S4.** ERP waveforms as in Figure S3 for 20 healthy controls.

**Table S5.** Means ( $\pm\text{SD}$ ) of N1 sink (factor 345)

**Table S6.** Means ( $\pm\text{SD}$ ) of P2 source (factor 600)

**Patients**  
(*n* = 21)

**ERP**  
(linked-mastoids reference)

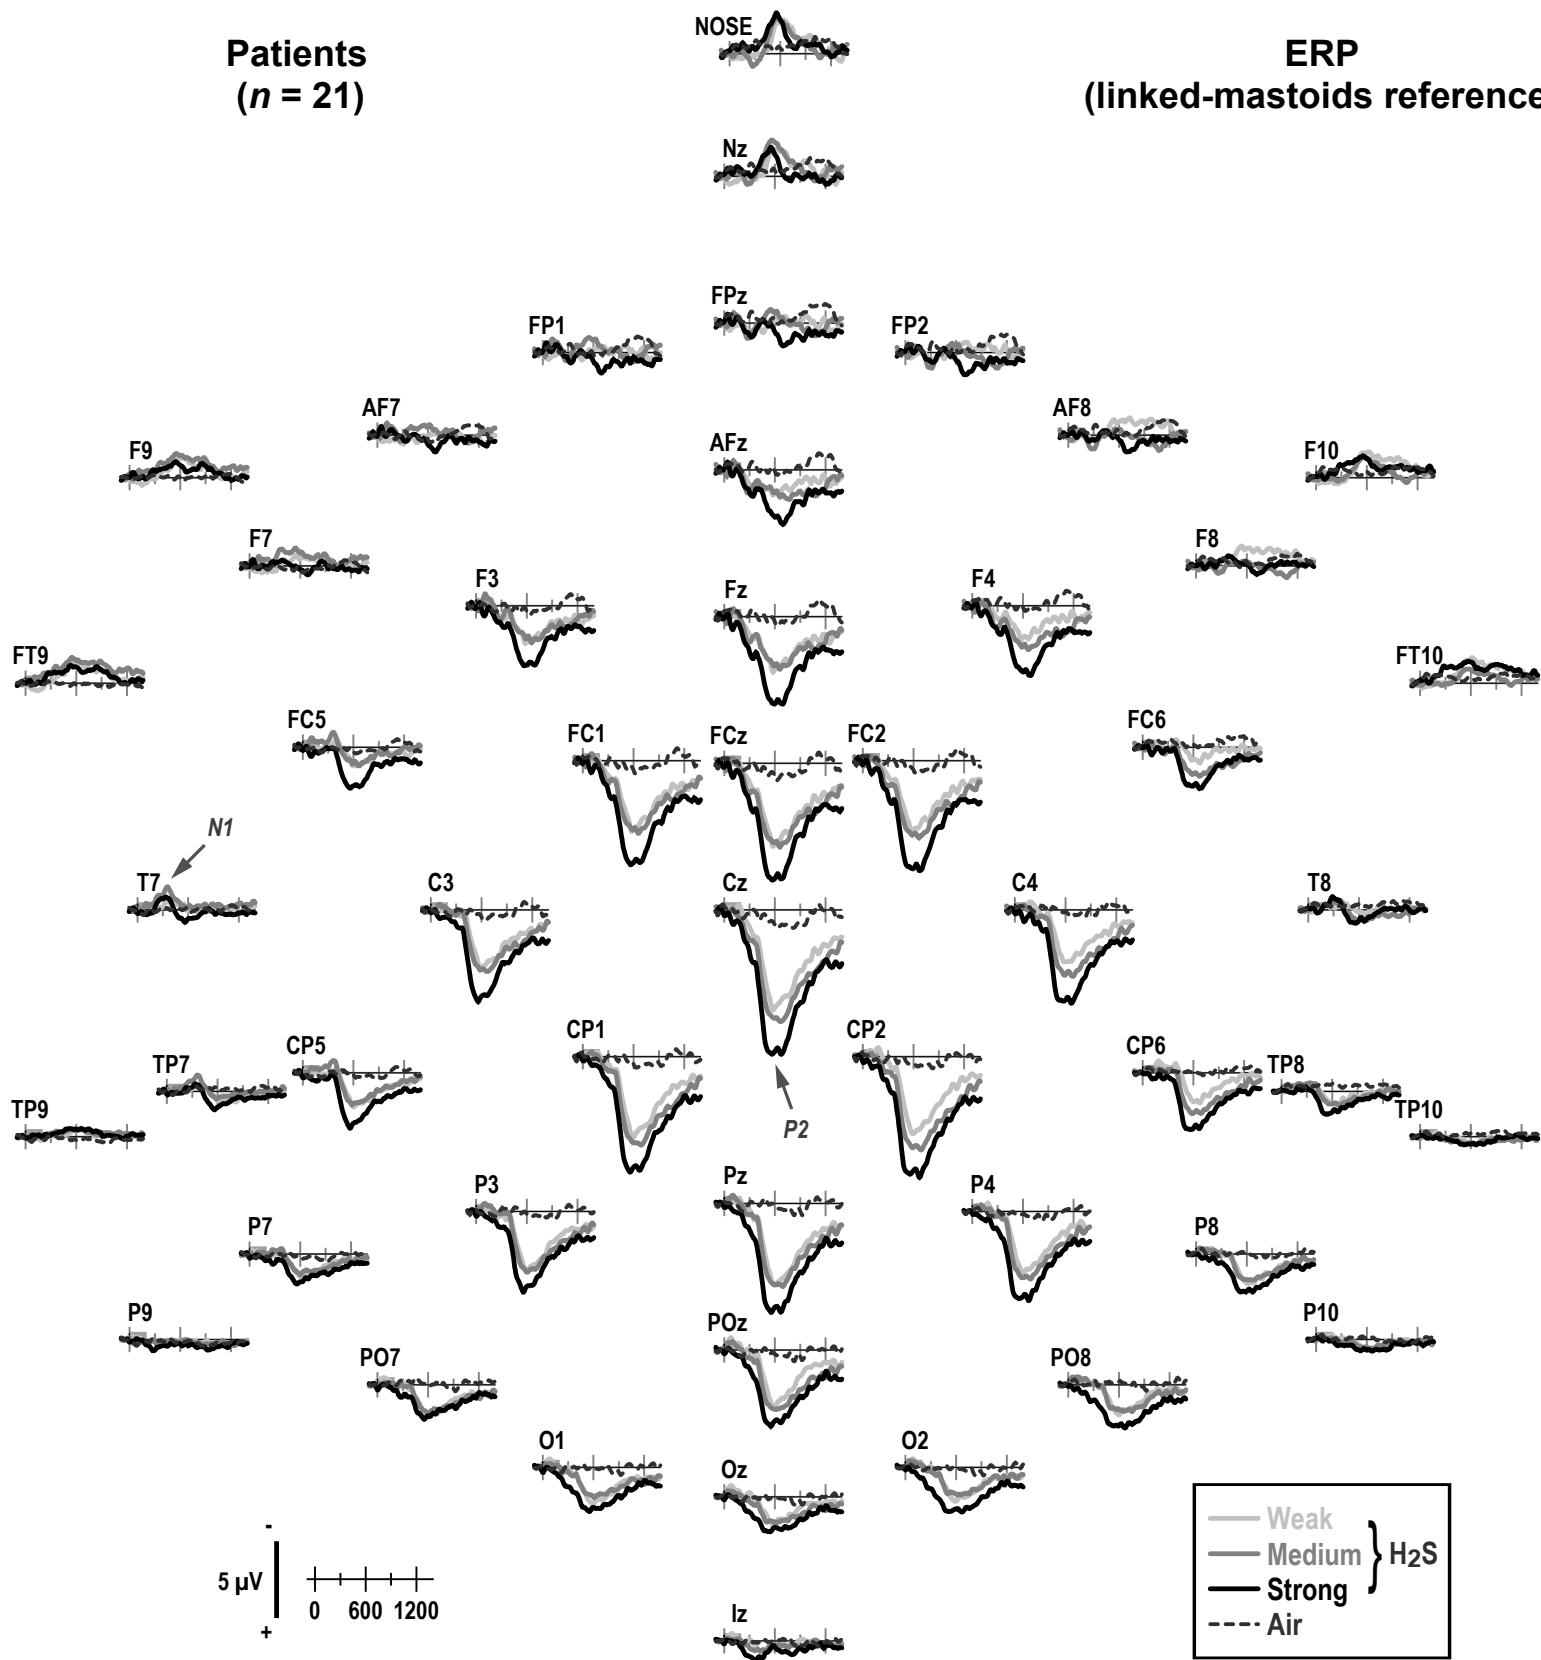

**Controls**  
(n = 20)

**ERP**  
(linked-mastoids reference)

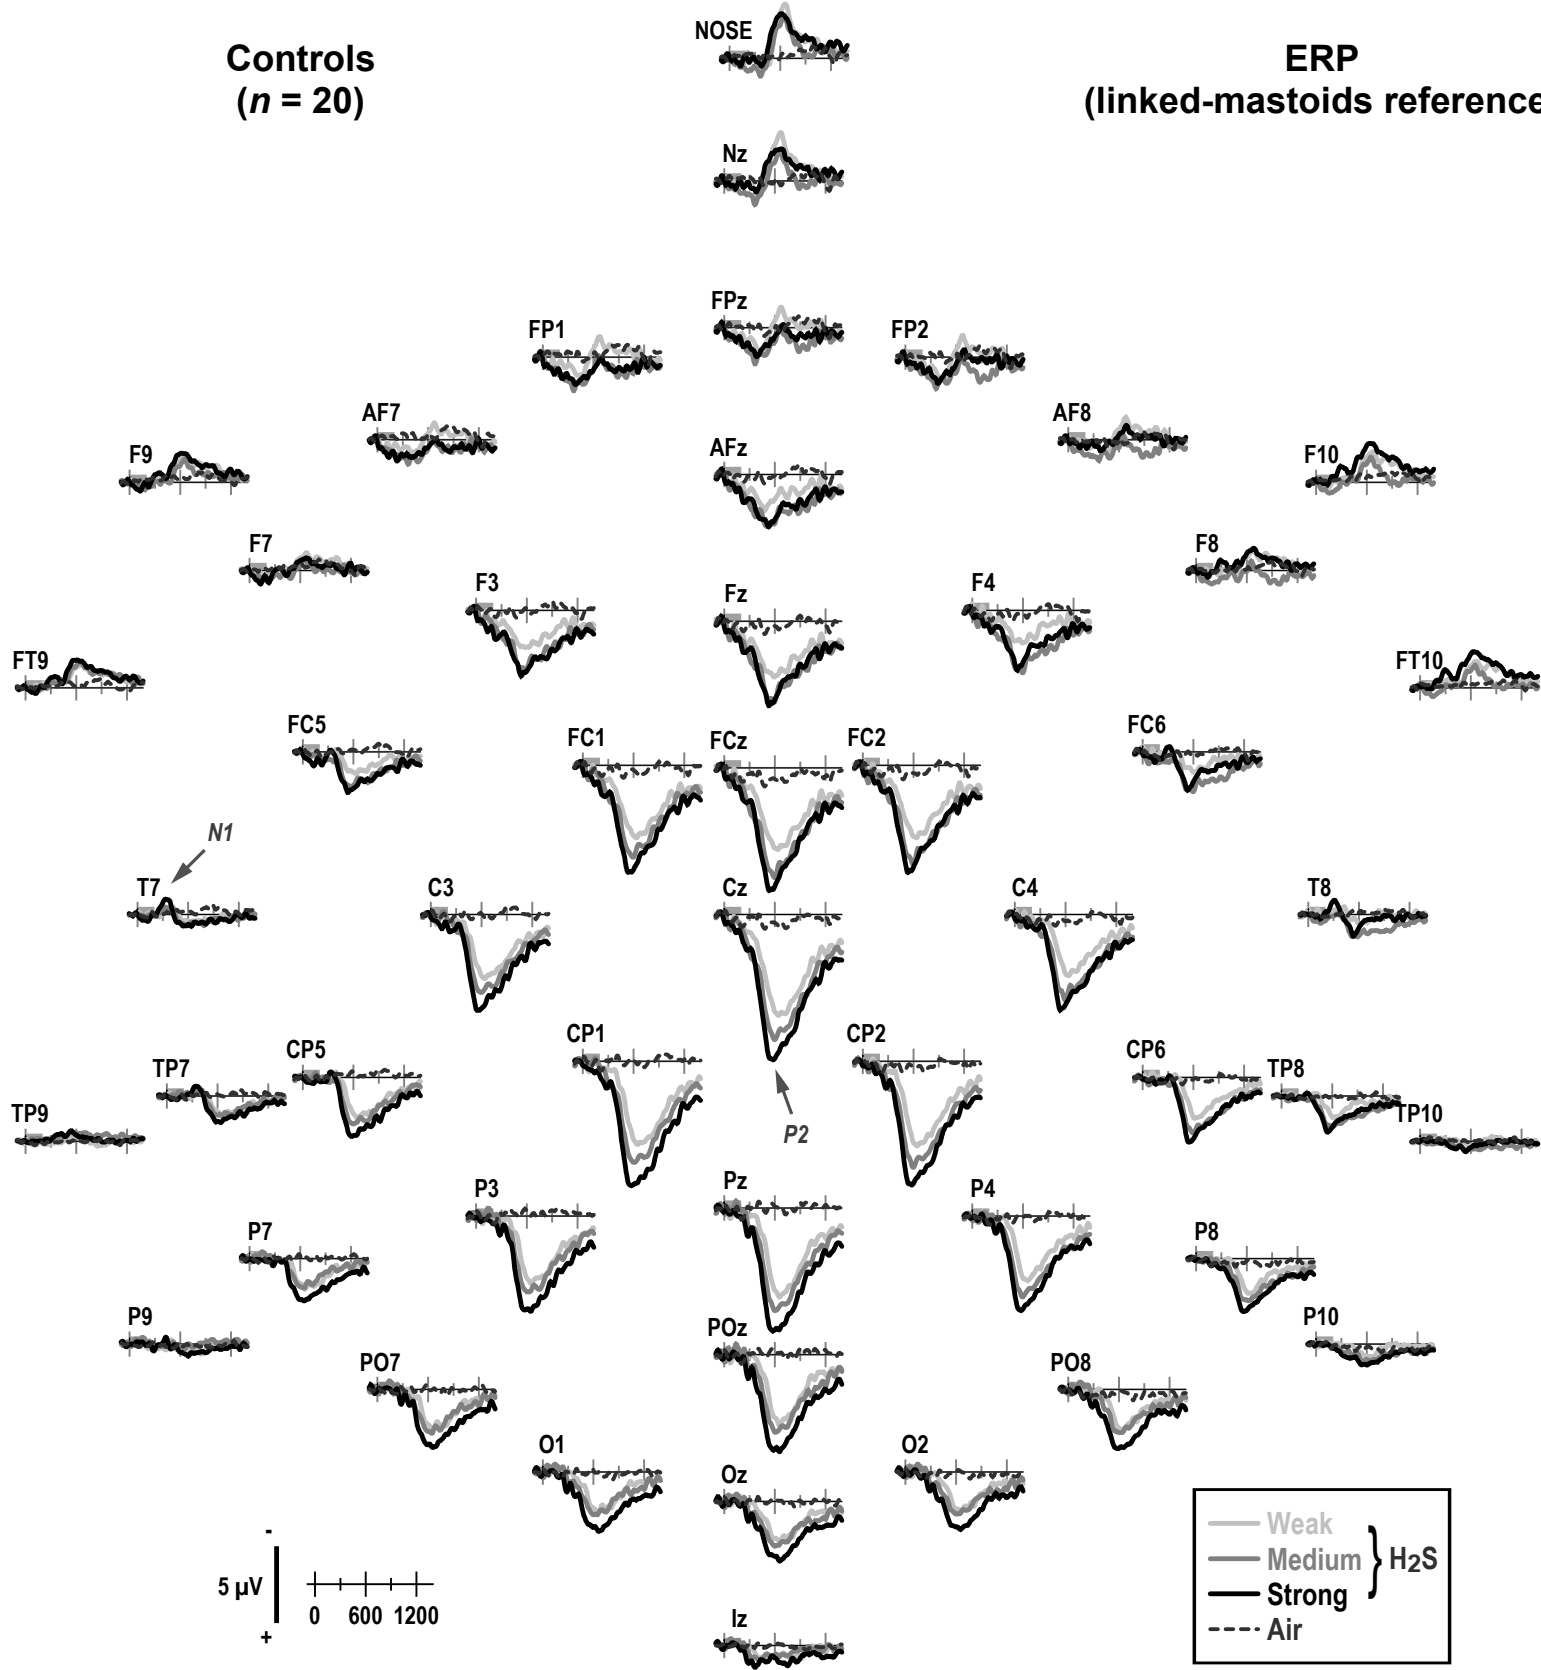

**Patients**  
( $n = 21$ )

**ERP**  
(average reference)

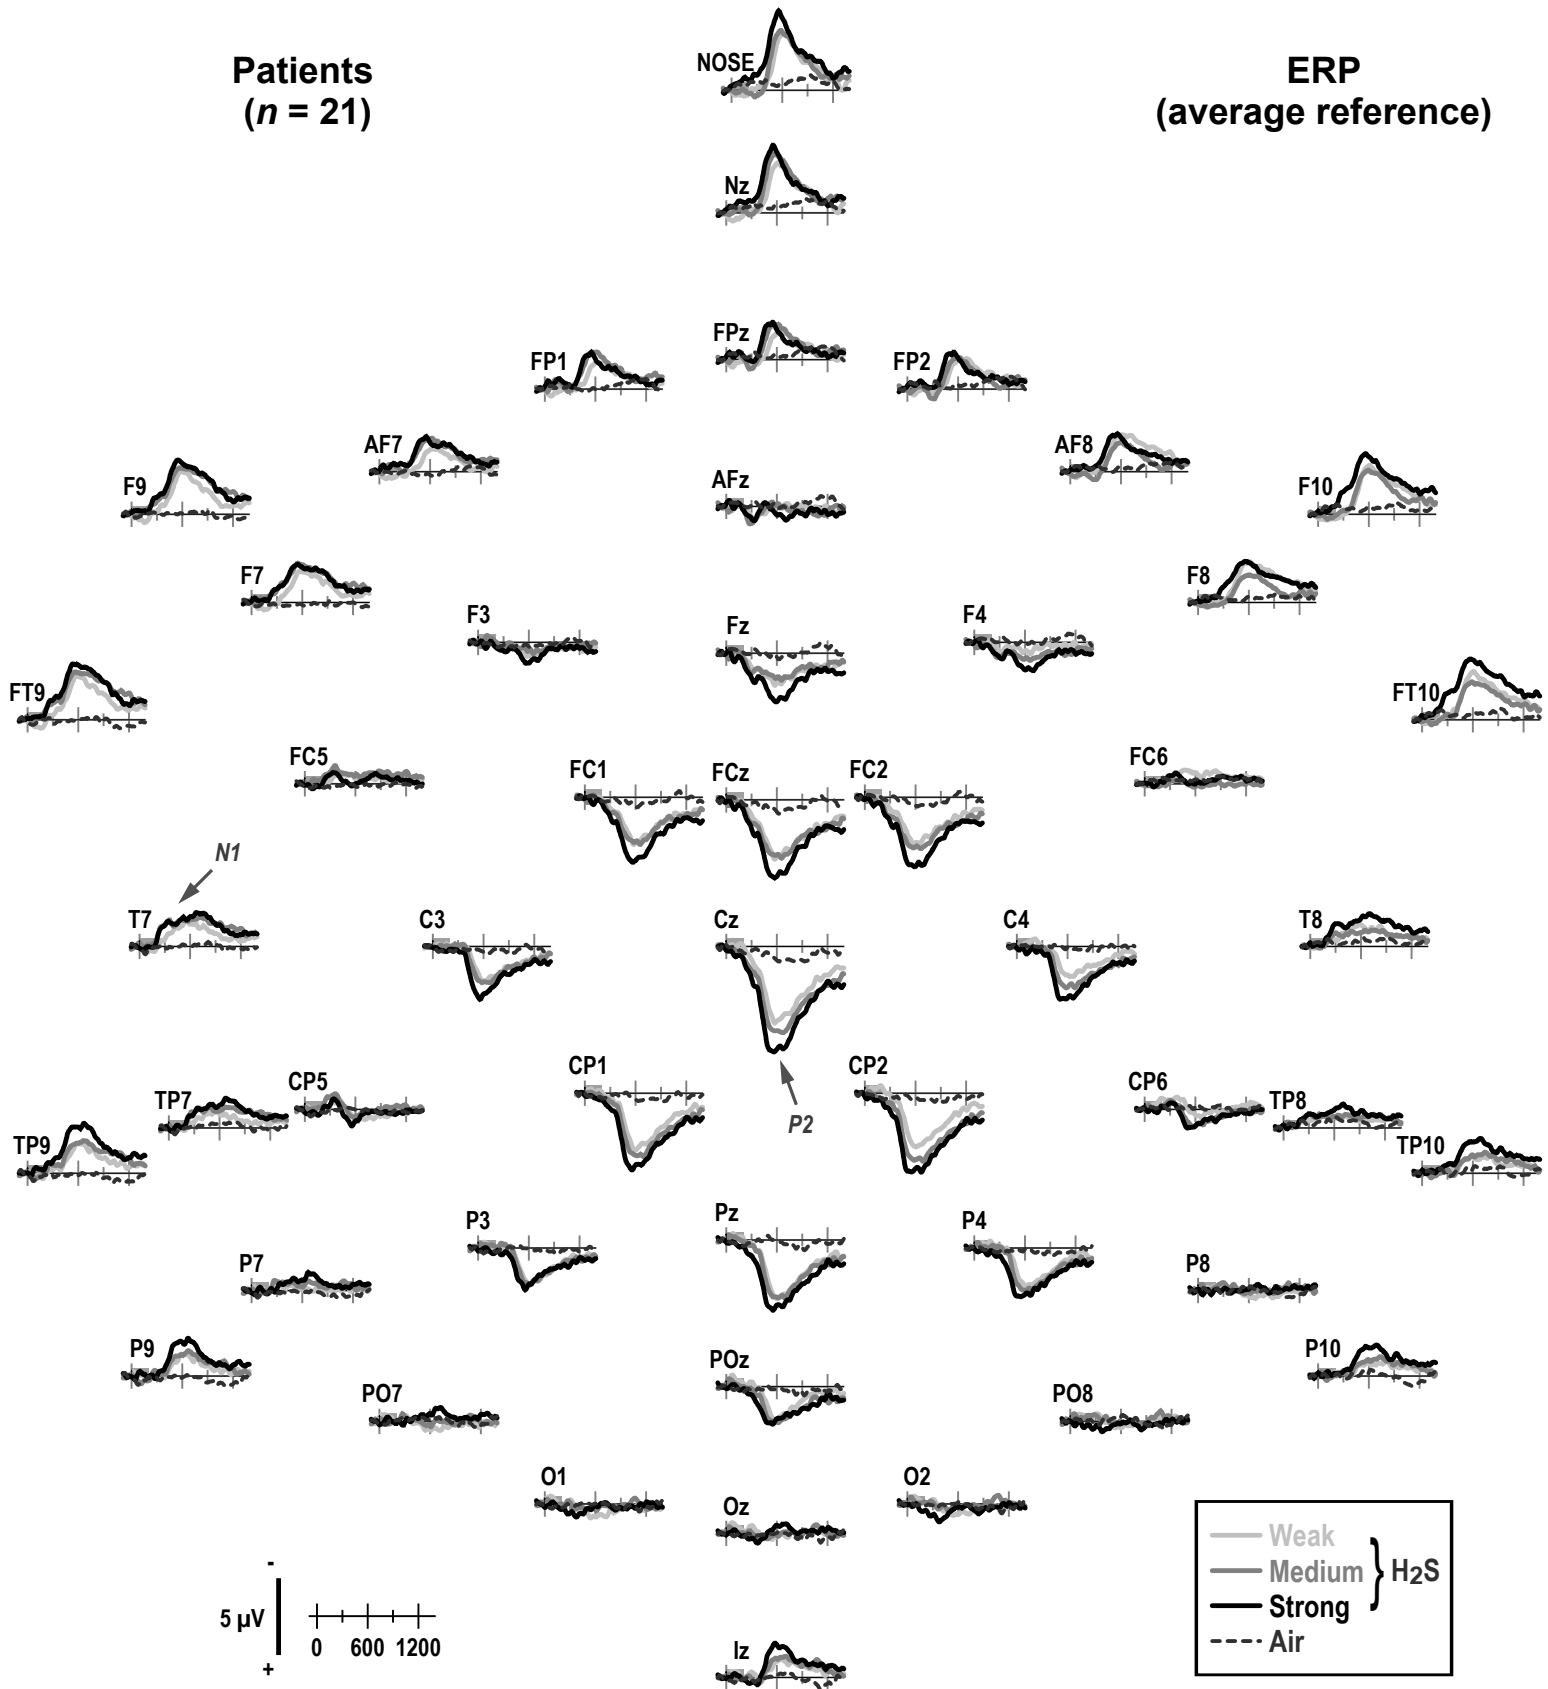

**Controls**  
(*n* = 20)

NOSE

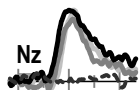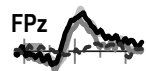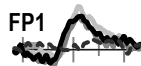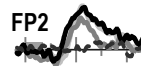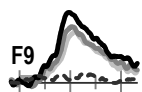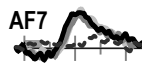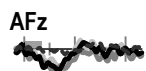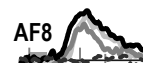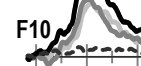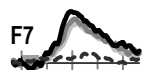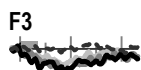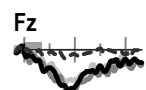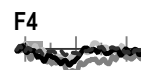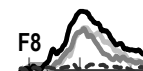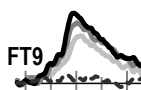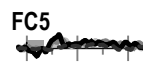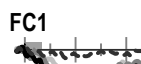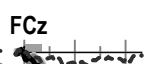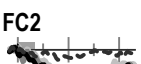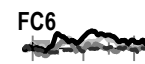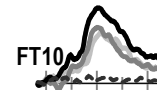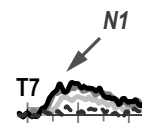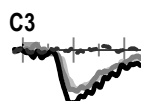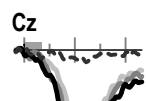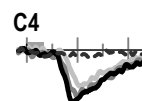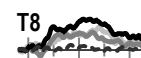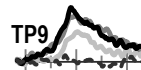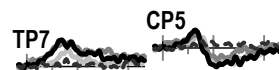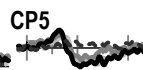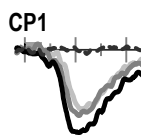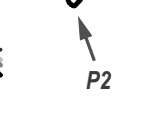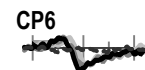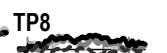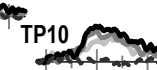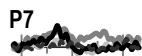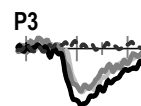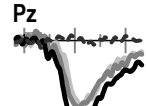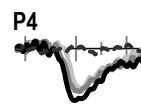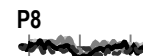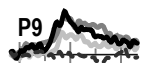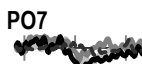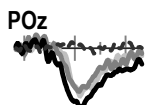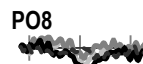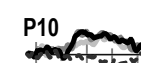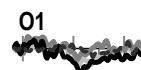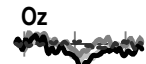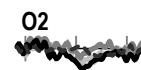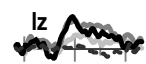

**ERP**  
(average reference)

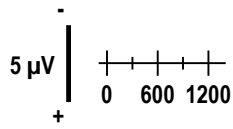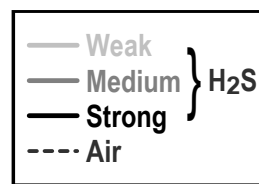

**Table S5.** Means ( $\pm$ SD) of N1 sink (factor 345)

|                              |                           | Sink activity at lateral-temporal and medial-frontocentroparietal sites<br>(T7/8, FC5/6, C3/4, CP5/6) |                     |                     |                     |                     |                     |
|------------------------------|---------------------------|-------------------------------------------------------------------------------------------------------|---------------------|---------------------|---------------------|---------------------|---------------------|
| Odor Intensity               |                           | Weak                                                                                                  |                     | Medium              |                     | Strong              |                     |
|                              | Hemisphere                | Left                                                                                                  | Right               | Left                | Right               | Left                | Right               |
| Patients<br>( <i>n</i> = 21) | Male<br>( <i>n</i> = 13)  | -0.35<br>$\pm$ 0.85                                                                                   | -0.42<br>$\pm$ 0.76 | -0.76<br>$\pm$ 1.03 | -0.80<br>$\pm$ 0.85 | -0.72<br>$\pm$ 1.16 | -0.74<br>$\pm$ 1.15 |
|                              | Female<br>( <i>n</i> = 8) | -0.62<br>$\pm$ 0.86                                                                                   | -0.18<br>$\pm$ 0.97 | -0.89<br>$\pm$ 0.99 | -0.59<br>$\pm$ 1.03 | -1.25<br>$\pm$ 1.21 | -0.85<br>$\pm$ 1.11 |
| Controls<br>( <i>n</i> = 20) | Male<br>( <i>n</i> = 13)  | -0.34<br>$\pm$ 0.56                                                                                   | -0.24<br>$\pm$ 0.49 | -0.68<br>$\pm$ 0.74 | -0.74<br>$\pm$ 0.61 | -1.10<br>$\pm$ 0.90 | -1.04<br>$\pm$ 0.86 |
|                              | Female<br>( <i>n</i> = 6) | -0.20<br>$\pm$ 0.69                                                                                   | -0.14<br>$\pm$ 0.53 | -0.53<br>$\pm$ 0.50 | -0.32<br>$\pm$ 0.54 | -0.68<br>$\pm$ 0.71 | -0.47<br>$\pm$ 0.59 |

**Table S6.** Means ( $\pm$ SD) of P2 source (factor 600)

|                              |                           | Source activity at mid-frontocentral and mid-parietal sites<br>(FCz, FC1/2, Cz, C3/4, CP1/2, Pz, P3/4, POz) |                    |                    |
|------------------------------|---------------------------|-------------------------------------------------------------------------------------------------------------|--------------------|--------------------|
| Odor Intensity               |                           | Weak                                                                                                        | Medium             | Strong             |
| Patients<br>( <i>n</i> = 21) | Male<br>( <i>n</i> = 13)  | 0.45<br>$\pm$ 0.87                                                                                          | 0.51<br>$\pm$ 0.75 | 0.77<br>$\pm$ 0.92 |
|                              | Female<br>( <i>n</i> = 8) | 1.03<br>$\pm$ 1.11                                                                                          | 1.00<br>$\pm$ 0.99 | 1.12<br>$\pm$ 1.28 |
| Controls<br>( <i>n</i> = 20) | Male<br>( <i>n</i> = 13)  | 0.54<br>$\pm$ 0.91                                                                                          | 0.69<br>$\pm$ 0.89 | 0.95<br>$\pm$ 1.02 |
|                              | Female<br>( <i>n</i> = 6) | 0.71<br>$\pm$ 0.92                                                                                          | 0.84<br>$\pm$ 0.70 | 0.94<br>$\pm$ 0.87 |
